# Supplementary material for: The Impact of Telework and Closure of Educational and Childcare Facilities on Working People During COVID-19
Source: Atypon-hosted journal article supplement (doi:10.1026/0932-4089/a000370), 2021-09-16
Supplement: 0932-4089_a000370_esm1.pdf [file 0932-4089_a000370_esm1.pdf]

## Electronic Supplement 1.

**Table E1.** Values of comparable studies conducted before the pandemic (pre-covid-19 studies).

| Life Satisfaction      |                                |                                                                        | Positive Affect             |          |                          | Negative Affect             |          |                          | Perceived Stress            |                              |                                                                            |
|------------------------|--------------------------------|------------------------------------------------------------------------|-----------------------------|----------|--------------------------|-----------------------------|----------|--------------------------|-----------------------------|------------------------------|----------------------------------------------------------------------------|
| Source                 | <i>N</i>                       | <i>M</i> ( <i>SD</i> )                                                 | Source                      | <i>N</i> | <i>M</i> ( <i>SD</i> )   | Source                      | <i>N</i> | <i>M</i> ( <i>SD</i> )   | Source                      | <i>N</i>                     | <i>M</i> ( <i>SD</i> )                                                     |
| Volmer et al. (2019)   | 395                            | 5.16 (1.02)                                                            | Kushlev et al. (2019)       | 544      | 3.55 (0.92)              | Kushlev et al. (2019)       | 544      | 2.36 (0.93)              | Kiesswetter et al. (2019)   | 228 <i>m</i><br>228 <i>w</i> | 34.42 (14.98) <sup>b</sup> <i>m</i><br>36.93 (14.43) <sup>b</sup> <i>w</i> |
| Jovanović (2016)       | 481                            | 4.82 (1.19) <sup>a</sup>                                               | Rahm et al. (2017)          | 498      | 3.71 (0.65) <sup>a</sup> | Rahm et al. (2017)          | 498      | 2.39 (0.71) <sup>a</sup> | Orellana-Rios et al. (2018) | 28                           | 35.00 (18.00) <sup>c</sup>                                                 |
| Matud et al. (2014)    | 1233 <i>m</i><br>1233 <i>w</i> | 4.92 (1.18) <sup>a</sup> <i>m</i><br>4.80 (1.28) <sup>a</sup> <i>w</i> | Silva et al. (2013) Study 1 | 717      | 3.95 (0.71) <sup>a</sup> | Silva et al. (2013) Study 1 | 717      | 2.49 (0.82) <sup>a</sup> | Kocalevent et al. (2011)    | 2552                         | 30.00 (15.00) <sup>c</sup>                                                 |
| Glaesmer et al. (2011) | 2519                           | 4.98 (1.25) <sup>a</sup>                                               | Silva et al. (2013) Study 2 | 194      | 3.92 (0.67) <sup>a</sup> | Silva et al. (2013) Study 2 | 194      | 2.22 (0.78) <sup>a</sup> |                             |                              |                                                                            |

<sup>a</sup> Values were transformed because the study added up all item values without dividing the result by the number of items. <sup>b</sup> Sample consists of infertile test persons. <sup>c</sup> Values were transformed because the study did not multiply the result with 100. *m* = Value for males (study only reported the values separately for the sexes). *w* = Value for females (study only reported the values separately for the sexes).

## References

- Volmer, J., Koch, I. K. & Wolff, C. (2019). Illuminating the ‘dark core’: Mapping global versus specific sources of variance across multiple measures of the dark triad. *Personality and Individual Differences*, *145*, 97–102. <https://doi.org/10.1016/j.paid.2019.03.024>
- Jovanović, V. (2016). The validity of the Satisfaction with Life Scale in adolescents and a comparison with single-item life satisfaction measures: a preliminary study. *Quality of Life Research*, *25*(12), 3173–3180. <https://doi.org/10.1007/s11136-016-1331-5>
- Matud, M. P., Bethencourt, J. M. & Ibáñez, I. (2014). Relevance of gender roles in life satisfaction in adult people. *Personality and Individual Differences*, *70*, 206–211. <https://doi.org/10.1016/j.paid.2014.06.046>
- Glaesmer, H., Grande, G., Braehler, E. & Roth, M. (2011). The German version of the satisfaction with life scale (SWLS). *European Journal of Psychological Assessment*, *27*(2), 127–132. <https://doi.org/10.1027/1015-5759/a000058>
- Kushlev, K., Drummond, D. M., Heintzelman, S. J. & Diener, E. (2020). Do happy people care about society’s problems? *The Journal of Positive Psychology*, *15*(4), 467–477. <https://doi.org/10.1080/17439760.2019.1639797>

- Rahm, T., Heise, E. & Schuldt, M. (2017). Measuring the frequency of emotions: Validation of the Scale of Positive and Negative Experience (SPANE) in Germany. *PLoS ONE*, *12*(2). <https://doi.org/10.1371/journal.pone.0171288>
- Silva, A. J. & Caetano, A. (2013). Validation of the flourishing scale and scale of positive and negative experience in Portugal. *Social indicators research*, *110*(2), 469–478. <https://doi.org/10.1007/s11205-011-9938-y>
- Kiesswetter, M., Marsoner, H., Luehwink, A., Fistarol, M., Mahlke, A., & Duschek, S. (2020). Impairments in life satisfaction in infertility: Associations with perceived stress, affectivity, partnership quality, social support and the desire to have a child. *Behavioral Medicine*, *46*(2), 130-141. <https://doi.org/10.1080/08964289.2018.1564897>
- Orellana-Rios, C. L., Radbruch, L., Kern, M., Regel, Y. U., Anton, A., Sinclair, S. & Schmidt, S. (2018). Mindfulness and compassion-oriented practices at work reduce distress and enhance self-care of palliative care teams: a mixed-method evaluation of an “on the job“ program. *BMC palliative care*, *17*(1), 3. <https://doi.org/10.1186/s12904-017-0219-7>
- Kocalevent, R. D., Hinz, A., Brähler, E. & Klapp, B. F. (2011). Regionale und individuelle Faktoren von Stresserleben in Deutschland: Ergebnisse einer repräsentativen Befragung mit dem Perceived Stress Questionnaire (PSQ). *Das Gesundheitswesen*, *73*(12), 829–834. <https://doi.org/10.1055/s-0030-1268445>

**Table E2.** Comparisons of the combined pre-covid-19 studies with our subgroups.

|                            | <i>N</i> | <i>M (SD)</i> | <i>t</i> -Test (comparing the combined Pre-Covid Studies with each subgroup) | Cohen's <i>d</i> |
|----------------------------|----------|---------------|------------------------------------------------------------------------------|------------------|
| <b>Life Satisfaction</b>   |          |               |                                                                              |                  |
| Combined Pre-Covid Studies | 5861     | 4.94 (1.18)   |                                                                              |                  |
| Our subgroup: Telework     | 296      | 5.29 (1.01)   | $t(336) = 5.77, p < .001,$<br>95%-CI[-0.50, -0.23]                           | 0.299            |
| Our subgroup: No Telework  | 138      | 4.77 (1.06)   | $t(145) = 1.86, p = .065,$<br>95%-CI[-0.02, 0.35]                            | -0.144           |
| <b>Positive Affect</b>     |          |               |                                                                              |                  |
| Combined Pre-Covid Studies | 1953     | 3.78 (0.74)   |                                                                              |                  |
| Our subgroup: Telework     | 296      | 3.67 (0.67)   | $t(412) = 2.59, p < .01,$<br>95%-CI[0.03, 0.19]                              | -0.150           |
| Our subgroup: No Telework  | 138      | 3.04 (0.80)   | $t(154) = 10.55, p < .001,$<br>95%-CI[0.60, 0.88]                            | -0.995           |
| <b>Negative Affect</b>     |          |               |                                                                              |                  |
| Combined Pre-Covid Studies | 1953     | 2.37 (0.81)   |                                                                              |                  |
| Our subgroup: Telework     | 296      | 2.62 (0.77)   | $t(400) = 5.17, p < .001,$<br>95%-CI[-0.35, -0.15]                           | 0.311            |
| Our subgroup: No Telework  | 138      | 2.81 (0.84)   | $t(155) = 5.96, p < .001,$<br>95%-CI[-0.59, -0.29]                           | 0.311            |
| <b>Perceived Stress</b>    |          |               |                                                                              |                  |
| Combined Pre-Covid Studies | 3036     | 34.09 (15.06) |                                                                              |                  |
| Our subgroup: Telework     | 296      | 38.42 (18.95) | $t(332) = 3.82, p < .001,$<br>95%-CI[-6.56, -2.10]                           | 0.280            |
| Our subgroup: No Telework  | 138      | 43.78 (21.45) | $t(143) = 5.25, p < .001,$<br>95%-CI[-13.34, -6.04]                          | 0.630            |

*Note.* The mean values and standard deviations of the combined pre-covid studies represent the average values of the original studies. The sample sizes of the combined pre-covid studies represent the summed-up values of the original studies.
